# Supplementary material for: Analyzing Predictors of Control Measures and Psychosocial Problems Associated with COVID-19 Pandemic: Evidence from Eight Countries
Source: MDPI journal article supplement (doi:10.3390/bs11080106), 2021-07-21
Supplement: s1 [file s1]

## Method

**Accessibility:** Based on participants' responses, we define a simple information accessibility metric, namely, COVID-19 information accessibility score (CovIA score) to determine the accessibility level of each respondent [47,48]. We have computed this COVID-19 information accessibility score as follows. The respondents were asked through which source(s) they heard about COVID-19. Here multiple options were provided, and the respondents were free to choose multiple sources. We counted the number of sources and defined it as the COVID-19 information accessibility score. So, a high CovIA score indicates better accessibility.

**Behavior:** We define a simple behavioral score metric, namely, COVID-19 behavioral score (CovBh score) with respect to the behavior/practices of the respondents [49–52]. There were some questions related to positive behavior/practices (e.g., Practicing self-isolation/Home quarantine) and some with respect to negative practices (e.g., visiting public places). All these questions were 'yes/no' questions. The score is defined by summing the individual practices as follows: for positive (negative) practices, a positive response was translated to a 1 (0) score and a negative response to a 0 (1) score. So, a high CovBh score indicates better behavior/practice.

**Knowledge:** A simple knowledge score metric, namely, COVID-19 knowledge score (CovKd score) has been defined to determine the COVID-19 knowledge level of the respondents [49,50,53,54]. All the relevant questions expected simple 'yes/no' answers about a particular piece of knowledge (e.g., whether COVID-19 transmission is done through Contact with respiratory droplets of infected persons) and an affirmative (negative) answer was given a score of 1 (0). In the sequel all the individual scores were summed up to get the CovKd score. Clearly, a high CovKd score indicates a better knowledge level.

**Opinion:** Responses to a few questions asking the opinion of the respondents on various intervention related issues (e.g., whether the government should lock-down/restrict travel areas to avoid spread of COVID-19) have been used to define a COVID-19 Opinion score (CovOp score) as follows [55,56]. Each of these questions expected a response from a choice of 5 options (strongly agree, agree, neutral, disagree, and strongly disagree) which was later translated into a score in a scale of 5 (5 for strongly agree and 1 for strongly disagree). Thus, a higher CovOp score indicates a more positive opinion towards various interventions (expected to be implemented by the government) to control the spread of COVID-19.

**Psychosocial Health:** To capture a brief psychosocial profile of the respondents, a simple score metric, namely, COVID-19 psychosocial-health score (CovPsy score) has been defined based on a few queries regarding the mental state thereof during and due to COVID-19 [52,57–59]. All the relevant questions expected simple 'yes/no' answers about a particular mental state (e.g., depression/ anxiety) and an affirmative (negative) answer was given a score of 1 (0). In the sequel all the individual scores were summed up to get the CovPsy score. Unlike the other scores defined above, a high CovPsy score indicates a worse psychological profile.

**Susceptibility:** To judge the susceptibility to COVID-19, the respondents were asked a few questions (e.g., whether they had some severe pre-existing

conditions like respiratory disease) expecting 'yes/no' answers [60]. Subsequently, an affirmative (negative) answer was translated to a score of 1 (0) and all the individual scores were summed up to get a COVID-19 Susceptibility score (CovSus score). Thus, a high CovSus score indicates a more susceptible profile.

**Table S1.** Demographic, education, and professional statistics of participants across different countries.

| countries                    | AgeBin |            |     | Education |    |     | Profession                                |                               | Gender |      |
|------------------------------|--------|------------|-----|-----------|----|-----|-------------------------------------------|-------------------------------|--------|------|
|                              | <= 25  | >25 - <=50 | >50 | P*        | S* | T*  | Academi-<br>cian/Ad-<br>ministra-<br>tion | Medical<br>Profession-<br>als | Female | Male |
| Algeria                      | 0      | 1          | 0   | 0         | 0  | 0   | 1                                         | 0                             | 0      | 1    |
| Argentina                    | 0      | 0          | 1   | 0         | 0  | 0   | 0                                         | 1                             | 0      | 1    |
| Australia                    | 0      | 1          | 1   | 0         | 0  | 1   | 1                                         | 1                             | 2      | 0    |
| Bangladesh                   | 332    | 150        | 0   | 0         | 42 | 204 | 145                                       | 337                           | 227    | 255  |
| Bosnia &<br>Herze-<br>govina | 13     | 8          | 3   | 0         | 5  | 14  | 24                                        | 0                             | 12     | 12   |
| Brazil                       | 6      | 4          | 0   | 0         | 4  | 2   | 10                                        | 0                             | 8      | 2    |
| Canada                       | 0      | 3          | 0   | 0         | 0  | 2   | 2                                         | 1                             | 2      | 1    |
| Chile                        | 0      | 2          | 1   | 0         | 0  | 1   | 0                                         | 3                             | 1      | 2    |
| China                        | 381    | 245        | 86  | 106       | 32 | 565 | 564                                       | 148                           | 324    | 388  |
| Colombia                     | 4      | 7          | 1   | 0         | 0  | 4   | 0                                         | 12                            | 5      | 7    |
| Congo                        | 0      | 1          | 0   | 0         | 1  | 0   | 0                                         | 1                             | 1      | 0    |
| Egypt                        | 0      | 0          | 1   | 0         | 0  | 1   | 0                                         | 1                             | 1      | 0    |
| England                      | 0      | 8          | 3   | 0         | 0  | 3   | 3                                         | 8                             | 3      | 8    |
| Falkland Is-<br>lands        | 0      | 1          | 0   | 0         | 0  | 0   | 0                                         | 1                             | 0      | 1    |
| Finland                      | 0      | 1          | 0   | 0         | 0  | 1   | 1                                         | 0                             | 1      | 0    |
| Germany                      | 0      | 4          | 0   | 0         | 0  | 3   | 3                                         | 1                             | 3      | 1    |
| Ghana                        | 25     | 10         | 0   | 0         | 3  | 24  | 22                                        | 13                            | 28     | 7    |
| Hong Kong                    | 0      | 1          | 0   | 0         | 0  | 1   | 1                                         | 0                             | 0      | 1    |
| Hungary                      | 0      | 3          | 0   | 0         | 2  | 1   | 3                                         | 0                             | 1      | 2    |
| India                        | 3      | 8          | 0   | 0         | 0  | 5   | 2                                         | 9                             | 8      | 3    |
| Indonesia                    | 0      | 1          | 1   | 0         | 0  | 0   | 1                                         | 1                             | 1      | 1    |
| Iran                         | 0      | 1          | 0   | 0         | 0  | 0   | 0                                         | 1                             | 0      | 1    |
| Ireland                      | 0      | 2          | 0   | 0         | 0  | 1   | 0                                         | 2                             | 1      | 1    |
| Italy                        | 2      | 2          | 1   | 0         | 0  | 1   | 1                                         | 4                             | 3      | 2    |

|                   |     |     |    |   |    |     |     |     |     |     |
|-------------------|-----|-----|----|---|----|-----|-----|-----|-----|-----|
| Japan             | 14  | 55  | 10 | 0 | 12 | 52  | 59  | 20  | 46  | 33  |
| Kazakhstan        | 0   | 2   | 0  | 0 | 0  | 1   | 2   | 0   | 1   | 1   |
| Kenya             | 0   | 2   | 0  | 0 | 0  | 1   | 1   | 1   | 2   | 0   |
| Laos              | 0   | 0   | 1  | 0 | 0  | 1   | 1   | 0   | 0   | 1   |
| Macedonia         | 0   | 1   | 0  | 0 | 0  | 0   | 1   | 0   | 1   | 0   |
| Malawi            | 0   | 1   | 1  | 0 | 0  | 2   | 2   | 0   | 0   | 2   |
| Malaysia          | 12  | 117 | 15 | 0 | 2  | 81  | 51  | 93  | 45  | 99  |
| Mexico            | 282 | 198 | 86 | 0 | 77 | 307 | 339 | 227 | 185 | 381 |
| Morocco           | 2   | 2   | 0  | 0 | 0  | 0   | 4   | 0   | 3   | 1   |
| Myanmar           | 1   | 1   | 0  | 0 | 0  | 2   | 1   | 1   | 0   | 2   |
| Nepal             | 1   | 14  | 0  | 0 | 0  | 5   | 1   | 14  | 6   | 9   |
| Nether-<br>lands  | 0   | 1   | 0  | 0 | 0  | 0   | 1   | 0   | 0   | 1   |
| New Zea-<br>land  | 0   | 2   | 1  | 0 | 1  | 2   | 3   | 0   | 2   | 1   |
| Nigeria           | 2   | 0   | 0  | 0 | 0  | 0   | 2   | 0   | 1   | 1   |
| Norway            | 0   | 7   | 0  | 0 | 0  | 5   | 4   | 3   | 4   | 3   |
| Oman              | 0   | 4   | 0  | 0 | 0  | 0   | 1   | 3   | 4   | 0   |
| Pakistan          | 68  | 193 | 0  | 0 | 7  | 122 | 58  | 203 | 140 | 121 |
| Philippines       | 0   | 1   | 0  | 0 | 0  | 1   | 1   | 0   | 0   | 1   |
| Portugal          | 0   | 0   | 1  | 0 | 0  | 1   | 1   | 0   | 0   | 1   |
| Qatar             | 0   | 1   | 0  | 0 | 0  | 0   | 1   | 0   | 1   | 0   |
| Saudi Ara-<br>bia | 0   | 9   | 0  | 0 | 0  | 5   | 0   | 9   | 5   | 4   |
| Scotland          | 0   | 1   | 0  | 0 | 0  | 1   | 0   | 1   | 0   | 1   |
| Singapore         | 0   | 1   | 0  | 0 | 0  | 0   | 0   | 1   | 0   | 1   |
| South Af-<br>rica | 0   | 3   | 0  | 0 | 2  | 0   | 3   | 0   | 3   | 0   |
| South Ko-<br>rea  | 0   | 2   | 0  | 0 | 0  | 2   | 1   | 1   | 2   | 0   |
| Spain             | 1   | 1   | 0  | 0 | 0  | 0   | 1   | 1   | 1   | 1   |
| Thailand          | 0   | 6   | 5  | 0 | 0  | 7   | 2   | 9   | 4   | 7   |
| Turkey            | 2   | 34  | 1  | 0 | 0  | 20  | 4   | 33  | 19  | 18  |
| Uganda            | 0   | 1   | 1  | 0 | 0  | 1   | 1   | 1   | 1   | 1   |

|                       |     |     |    |   |    |     |     |    |     |     |
|-----------------------|-----|-----|----|---|----|-----|-----|----|-----|-----|
| United Arab Emir-ates | 0   | 11  | 0  | 0 | 0  | 4   | 1   | 10 | 7   | 4   |
| United States         | 174 | 103 | 50 | 0 | 44 | 146 | 233 | 94 | 104 | 223 |
| United kingdom        | 1   | 20  | 9  | 0 | 3  | 9   | 2   | 28 | 11  | 19  |
| Venezuela             | 0   | 2   | 0  | 0 | 0  | 0   | 0   | 2  | 0   | 2   |
| Wales                 | 0   | 2   | 0  | 0 | 0  | 1   | 0   | 2  | 0   | 2   |
| Yemen                 | 0   | 1   | 0  | 0 | 0  | 0   | 0   | 1  | 1   | 0   |
| Zambia                | 11  | 63  | 2  | 0 | 0  | 42  | 57  | 19 | 46  | 30  |

\*P - Primary, S\* - Secondary, T\* - Tertiary

**Table S2.** p-value for different Chi-Squared Test result with 95% significance. (Significant results are bold).

|        | Country    | Bangladesh      | China           | Japan    | Malaysia       | Mexico          | Pakistan        | United States   | Zambia          |
|--------|------------|-----------------|-----------------|----------|----------------|-----------------|-----------------|-----------------|-----------------|
| CovIA  | AgeBin     | 0.638432        | -               | -        | -              | <b>0.021289</b> | 0.480976        | <b>0.002953</b> | -               |
|        | Education  | 0.63992         | -               | -        | -              | 0.370758        | -               | 0.398655        | -               |
|        | Profession | 0.630804        | -               | -        | 0.41821        | 0.082253        | 0.069245        | 0.976568        | -               |
|        | Gender     | 0.236722        | -               | 0.215158 | <b>0.00586</b> | 0.236988        | 0.600063        | <b>1.5E-05</b>  | <b>0.015102</b> |
| CovBh  | AgeBin     | 0.285826        | <b>0</b>        | -        | -              | 0.280734        | 0.200476        | <b>0.001433</b> | -               |
|        | Education  | 0.233542        | 0.8443          | -        | -              | 0.635582        | -               | 0.313313        | -               |
|        | Profession | 0.207023        | <b>0</b>        | -        | 0.394556       | 0.871557        | 0.712129        | 0.390742        | -               |
|        | Gender     | 0.082229        | <b>0.001246</b> | 0.881873 | 0.386059       | 0.287225        | <b>0.035004</b> | 0.077532        | 0.677289        |
| CovKd  | AgeBin     | 0.085209        | <b>0.001405</b> | -        | -              | 0.085659        | 0.814372        | <b>0.003143</b> | -               |
|        | Education  | 0.795284        | 0.559325        | -        | -              | 0.761924        | -               | 0.814719        | -               |
|        | Profession | 0.374437        | <b>0.000349</b> | -        | 0.214835       | <b>0.033686</b> | <b>0.0214</b>   | 0.214478        | -               |
|        | Gender     | 0.342825        | 0.077043        | 0.859365 | 0.713491       | 0.315941        | 0.476465        | <b>0.002141</b> | 0.303107        |
| CovOp  | AgeBin     | <b>0.012716</b> | <b>0</b>        | -        | -              | 0.798521        | 0.052919        | <b>0.028286</b> | -               |
|        | Education  | 0.635616        | 0.247827        | -        | -              | 0.840805        | -               | 0.52855         | -               |
|        | Profession | <b>0.000915</b> | <b>0</b>        | -        | 0.242195       | 0.335624        | <b>0.032801</b> | 0.070868        | -               |
|        | Gender     | 0.497986        | <b>0.00743</b>  | 0.099803 | 0.447941       | 0.735526        | 0.185414        | 0.199963        | 0.615565        |
| CovPsy | AgeBin     | 0.158072        | 0.131571        | -        | -              | <b>6.9E-05</b>  | 0.096796        | <b>0.026838</b> | -               |
|        | Education  | 0.888159        | 0.816996        | -        | -              | 0.404298        | -               | 0.533204        | -               |
|        | Profession | 0.686447        | <b>7.6E-05</b>  | -        | 0.430063       | 0.119577        | 0.337027        | 0.717567        | -               |

|        |            |                 |                 |                 |          |              |                 |                 |          |
|--------|------------|-----------------|-----------------|-----------------|----------|--------------|-----------------|-----------------|----------|
|        | Gender     | 0.083247        | <b>0.001378</b> | 0.058116        | 0.343748 | <b>2E-06</b> | 0.064302        | <b>1.5E-05</b>  | 0.808564 |
|        | AgeBin     | <b>1E-06</b>    | <b>0</b>        | -               | -        | <b>2E-06</b> | <b>0.018134</b> | 0.065527        | -        |
|        | Education  | 0.300013        | <b>0.009023</b> | -               | -        | 0.599691     | -               | 0.400781        | -        |
|        | Profession | <b>2E-06</b>    | <b>0</b>        | -               | 0.140142 | 0.278267     | <b>1E-06</b>    | <b>0.003691</b> | -        |
| CovSus | Gender     | <b>0.001706</b> | 0.050105        | <b>0.031476</b> | 0.332512 | 0.260335     | 0.582039        | 0.170098        | 0.241211 |

\*- : Result not available; \*0 : Value is too small fit in 6 decimal places.

**Table S3.** CovIA statistics for different AgeBin across different countries.

| Country       | AgeBin     | Mean  | Count | Std.  | CI95_high | CI95_low |
|---------------|------------|-------|-------|-------|-----------|----------|
| Bangladesh    | <= 25      | 3.087 | 332   | 0.845 | 4.736     | 1.439    |
| Bangladesh    | >25 - <=50 | 3.167 | 150   | 0.862 | 4.848     | 1.485    |
| Bangladesh    | >50        |       | 0     |       |           | 0        |
| China         | <= 25      |       | 0     |       |           | 0        |
| China         | >25 - <=50 |       | 0     |       |           | 0        |
| China         | >50        |       | 0     |       |           | 0        |
| Japan         | <= 25      | 2.357 | 14    | 0.745 | 3.81      | 0.904    |
| Japan         | >25 - <=50 | 2.4   | 55    | 0.915 | 4.184     | 0.616    |
| Japan         | >50        | 2.7   | 10    | 0.675 | 4.016     | 1.384    |
| Malaysia      | <= 25      | 3.5   | 12    | 0.905 | 5.264     | 1.736    |
| Malaysia      | >25 - <=50 | 3.205 | 117   | 0.876 | 4.914     | 1.496    |
| Malaysia      | >50        | 3.4   | 15    | 0.632 | 4.633     | 2.167    |
| Mexico        | <= 25      | 2.652 | 282   | 0.831 | 4.272     | 1.032    |
| Mexico        | >25 - <=50 | 2.601 | 198   | 0.829 | 4.218     | 0.984    |
| Mexico        | >50        | 2.733 | 86    | 1.022 | 4.726     | 0.739    |
| Pakistan      | <= 25      | 3.088 | 68    | 0.824 | 4.695     | 1.482    |
| Pakistan      | >25 - <=50 | 3.155 | 193   | 0.87  | 4.852     | 1.459    |
| Pakistan      | >50        |       | 0     |       |           | 0        |
| United States | <= 25      | 2.954 | 174   | 0.838 | 4.589     | 1.319    |
| United States | >25 - <=50 | 2.612 | 103   | 0.992 | 4.547     | 0.676    |
| United States | >50        | 2.72  | 50    | 0.97  | 4.611     | 0.829    |
| Zambia        | <= 25      | 2.273 | 11    | 0.905 | 4.037     | 0.509    |
| Zambia        | >25 - <=50 | 2.873 | 63    | 0.813 | 4.458     | 1.288    |
| Zambia        | >50        | 4     | 2     | 0     | 4         | 4        |

**Table S4.** CovIA statistics for different education group across different countries.

| Country    | Education | Mean  | Count | Std.  | CI95_high | CI95_low |
|------------|-----------|-------|-------|-------|-----------|----------|
| Bangladesh | S         | 3.262 | 42    | 0.734 | 4.694     | 1.83     |
| Bangladesh | T         | 3.113 | 204   | 0.82  | 4.711     | 1.514    |
| China      | P         |       | 0     |       |           | 0        |
| China      | S         |       | 0     |       |           | 0        |
| China      | T         |       | 0     |       |           | 0        |
| Japan      | S         | 2.417 | 12    | 0.793 | 3.963     | 0.87     |

|               |   |       |     |       |       |       |
|---------------|---|-------|-----|-------|-------|-------|
| Japan         | T | 2.462 | 52  | 0.851 | 4.121 | 0.802 |
| Malaysia      | S | 4     | 2   | 0     | 4     | 4     |
| Malaysia      | T | 3.222 | 81  | 0.806 | 4.794 | 1.65  |
| Mexico        | S | 2.519 | 77  | 0.883 | 4.241 | 0.798 |
| Mexico        | T | 2.674 | 307 | 0.858 | 4.348 | 1.001 |
| Pakistan      | S | 3.714 | 7   | 0.488 | 4.666 | 2.763 |
| Pakistan      | T | 3.123 | 122 | 0.858 | 4.797 | 1.449 |
| United States | S | 3.023 | 44  | 0.821 | 4.623 | 1.422 |
| United States | T | 2.788 | 146 | 0.941 | 4.623 | 0.953 |
| Zambia        | T | 2.762 | 42  | 0.878 | 4.474 | 1.049 |

**Table S5.** CovIA statistics for different profession group across different countries.

| Country.   | Profession                 | Mean  | Count | Std.  | CI95_high | CI95_low |
|------------|----------------------------|-------|-------|-------|-----------|----------|
| Bangladesh | Academician/Administration | 3.131 | 145   | 0.819 | 4.727     | 1.535    |
| Bangladesh | Medical Professionals      | 3.104 | 337   | 0.865 | 4.79      | 1.417    |
| China      | Academician/Administration |       | 0     |       |           | 0        |
| China      | Medical Professionals      |       | 0     |       |           | 0        |
| Japan      | Academician/Administration | 2.356 | 59    | 0.846 | 4.006     | 0.706    |
| Japan      | Medical Professionals      | 2.65  | 20    | 0.875 | 4.356     | 0.944    |
| Malaysia   | Academician/Administration | 3.314 | 51    | 0.883 | 5.035     | 1.592    |
| Malaysia   | Medical Professionals      | 3.215 | 93    | 0.845 | 4.863     | 1.567    |
| Mexico     | Academician/Administration | 2.658 | 339   | 0.894 | 4.402     | 0.914    |
| Mexico     | Medical Professionals      | 2.63  | 227   | 0.812 | 4.213     | 1.047    |
| Pakistan   | Academician/Administration | 2.879 | 58    | 0.957 | 4.745     | 1.014    |



|               |                            |       |     |       |       |       |
|---------------|----------------------------|-------|-----|-------|-------|-------|
| Pakistan      | Medical Professionals      | 3.212 | 203 | 0.814 | 4.799 | 1.624 |
| United States | Academician/Administration | 2.815 | 233 | 0.907 | 4.585 | 1.046 |
| United States | Medical Professionals      | 2.798 | 94  | 0.957 | 4.664 | 0.932 |
| Zambia        | Academician/Administration | 2.684 | 57  | 0.848 | 4.339 | 1.03  |
| Zambia        | Medical Professionals      | 3.211 | 19  | 0.787 | 4.746 | 1.675 |

**Table S6.** CovIA statistics for different gender group across different countries.

| Country       | Gender | Mean  | Count | Std.  | CI95_high | CI95_low |
|---------------|--------|-------|-------|-------|-----------|----------|
| Bangladesh    | Female | 3.185 | 227   | 0.821 | 4.785     | 1.585    |
| Bangladesh    | Male   | 3.047 | 255   | 0.873 | 4.749     | 1.345    |
| China         | Female |       | 0     |       |           | 0        |
| China         | Male   |       | 0     |       |           | 0        |
| Japan         | Female | 2.283 | 46    | 0.861 | 3.961     | 0.604    |
| Japan         | Male   | 2.636 | 33    | 0.822 | 4.24      | 1.033    |
| Malaysia      | Female | 2.933 | 45    | 1.031 | 4.944     | 0.922    |
| Malaysia      | Male   | 3.394 | 99    | 0.726 | 4.809     | 1.978    |
| Mexico        | Female | 2.627 | 185   | 0.936 | 4.453     | 0.801    |
| Mexico        | Male   | 2.656 | 381   | 0.824 | 4.263     | 1.05     |
| Pakistan      | Female | 3.129 | 140   | 0.912 | 4.908     | 1.35     |
| Pakistan      | Male   | 3.149 | 121   | 0.792 | 4.694     | 1.604    |
| United States | Female | 2.74  | 104   | 1.115 | 4.914     | 0.567    |
| United States | Male   | 2.843 | 223   | 0.815 | 4.433     | 1.254    |
| Zambia        | Female | 2.978 | 46    | 0.745 | 4.431     | 1.525    |
| Zambia        | Male   | 2.567 | 30    | 0.971 | 4.461     | 0.672    |

**Table S7.** CovBh statistics for different AgeBin across different countries.

| Country    | AgeBin     | Mean   | Count | Std.  | CI95_high | CI95_low |
|------------|------------|--------|-------|-------|-----------|----------|
| Bangladesh | <= 25      | 9.855  | 332   | 1.323 | 12.435    | 7.276    |
| Bangladesh | >25 - <=50 | 10.033 | 150   | 1.282 | 12.533    | 7.534    |

|               |            |        |     |       |        |       |
|---------------|------------|--------|-----|-------|--------|-------|
| Bangladesh    | >50        |        | 0   |       |        | 0     |
| China         | <= 25      | 6.669  | 381 | 2.041 | 10.648 | 2.69  |
| China         | >25 - <=50 | 6.555  | 245 | 2.137 | 10.723 | 2.388 |
| China         | >50        | 4.988  | 86  | 1.568 | 8.046  | 1.931 |
| Japan         | <= 25      | 8.071  | 14  | 1.639 | 11.268 | 4.875 |
| Japan         | >25 - <=50 | 8.527  | 55  | 1.386 | 11.23  | 5.825 |
| Japan         | >50        | 9.1    | 10  | 1.197 | 11.435 | 6.765 |
| Malaysia      | <= 25      | 9.917  | 12  | 0.996 | 11.859 | 7.974 |
| Malaysia      | >25 - <=50 | 9.932  | 117 | 1.023 | 11.927 | 7.936 |
| Malaysia      | >50        | 10.533 | 15  | 0.64  | 11.781 | 9.285 |
| Mexico        | <= 25      | 9.383  | 282 | 1.359 | 12.032 | 6.734 |
| Mexico        | >25 - <=50 | 9.414  | 198 | 1.344 | 12.036 | 6.793 |
| Mexico        | >50        | 9.849  | 86  | 1.163 | 12.117 | 7.58  |
| Pakistan      | <= 25      | 8.897  | 68  | 1.862 | 12.528 | 5.266 |
| Pakistan      | >25 - <=50 | 9.534  | 193 | 1.584 | 12.623 | 6.444 |
| Pakistan      | >50        |        | 0   |       |        | 0     |
| United States | <= 25      | 8.655  | 174 | 1.583 | 11.741 | 5.569 |
| United States | >25 - <=50 | 9.291  | 103 | 1.532 | 12.278 | 6.305 |
| United States | >50        | 8.92   | 50  | 1.893 | 12.612 | 5.228 |
| Zambia        | <= 25      | 9.455  | 11  | 1.128 | 11.654 | 7.255 |
| Zambia        | >25 - <=50 | 9.143  | 63  | 1.595 | 12.253 | 6.033 |
| Zambia        | >50        | 9.5    | 2   | 0.707 | 10.879 | 8.121 |

**Table S8.** CovBh statistics for different education group across different countries.

| Country    | Education | Mean  | Count | Std.  | CI95_high | CI95_low |
|------------|-----------|-------|-------|-------|-----------|----------|
| Bangladesh | S         | 10    | 42    | 1.148 | 12.238    | 7.762    |
| Bangladesh | T         | 9.804 | 204   | 1.456 | 12.642    | 6.965    |
| China      | P         | 6.075 | 106   | 2.119 | 10.207    | 1.944    |
| China      | S         | 6.438 | 32    | 2.109 | 10.55     | 2.325    |
| China      | T         | 6.517 | 565   | 2.084 | 10.58     | 2.453    |
| Japan      | S         | 7.5   | 12    | 1.834 | 11.076    | 3.924    |
| Japan      | T         | 8.827 | 52    | 1.216 | 11.199    | 6.455    |
| Malaysia   | S         | 9     | 2     | 1.414 | 11.758    | 6.242    |
| Malaysia   | T         | 10    | 81    | 0.987 | 11.925    | 8.075    |
| Mexico     | S         | 9.234 | 77    | 1.327 | 11.821    | 6.646    |
| Mexico     | T         | 9.498 | 307   | 1.297 | 12.028    | 6.969    |

|               |   |       |     |       |        |       |
|---------------|---|-------|-----|-------|--------|-------|
| Pakistan      | S | 8.571 | 7   | 2.37  | 13.194 | 3.949 |
| Pakistan      | T | 9.336 | 122 | 1.654 | 12.562 | 6.11  |
| United States | S | 8.727 | 44  | 1.436 | 11.528 | 5.926 |
| United States | T | 9.068 | 146 | 1.634 | 12.255 | 5.881 |
| Zambia        | T | 9.286 | 42  | 1.503 | 12.216 | 6.356 |

**Table S9.** CovBh statistics for different profession group across different countries.

| Country       | Profession                 | Mean   | Count | Std.  | CI95_high | CI95_low |
|---------------|----------------------------|--------|-------|-------|-----------|----------|
| Bangladesh    | Academician/Administration | 9.697  | 145   | 1.547 | 12.713    | 6.68     |
| Bangladesh    | Medical Professionals      | 10.003 | 337   | 1.186 | 12.317    | 7.689    |
| China         | Academician/Administration | 6.745  | 564   | 2.073 | 10.787    | 2.702    |
| China         | Medical Professionals      | 5.216  | 148   | 1.684 | 8.501     | 1.932    |
| Japan         | Academician/Administration | 8.39   | 59    | 1.462 | 11.241    | 5.538    |
| Japan         | Medical Professionals      | 8.9    | 20    | 1.252 | 11.342    | 6.458    |
| Malaysia      | Academician/Administration | 9.961  | 51    | 1.095 | 12.096    | 7.826    |
| Malaysia      | Medical Professionals      | 10.011 | 93    | 0.95  | 11.863    | 8.159    |
| Mexico        | Academician/Administration | 9.431  | 339   | 1.43  | 12.219    | 6.642    |
| Mexico        | Medical Professionals      | 9.515  | 227   | 1.176 | 11.809    | 7.222    |
| Pakistan      | Academician/Administration | 9.224  | 58    | 1.817 | 12.766    | 5.682    |
| Pakistan      | Medical Professionals      | 9.409  | 203   | 1.643 | 12.612    | 6.206    |
| United States | Academician/Administration | 8.815  | 233   | 1.654 | 12.042    | 5.589    |

|               |                            |       |    |       |        |       |
|---------------|----------------------------|-------|----|-------|--------|-------|
| United States | Medical Professionals      | 9.096 | 94 | 1.587 | 12.19  | 6.002 |
| Zambia        | Academician/Administration | 9.123 | 57 | 1.559 | 12.163 | 6.082 |
| Zambia        | Medical Professionals      | 9.421 | 19 | 1.387 | 12.126 | 6.716 |

**Table S10.** CovBh statistics for different gender group across different countries.

| Country       | Gender | Mean   | Count | Std.  | CI95_high | CI95_low |
|---------------|--------|--------|-------|-------|-----------|----------|
| Bangladesh    | Female | 9.722  | 227   | 1.475 | 12.598    | 6.847    |
| Bangladesh    | Male   | 10.078 | 255   | 1.123 | 12.269    | 7.888    |
| China         | Female | 6.096  | 324   | 2.098 | 10.187    | 2.004    |
| China         | Male   | 6.704  | 388   | 2.048 | 10.697    | 2.71     |
| Japan         | Female | 8.413  | 46    | 1.543 | 11.422    | 5.404    |
| Japan         | Male   | 8.667  | 33    | 1.242 | 11.088    | 6.245    |
| Malaysia      | Female | 9.933  | 45    | 1.053 | 11.987    | 7.88     |
| Malaysia      | Male   | 10.02  | 99    | 0.979 | 11.93     | 8.111    |
| Mexico        | Female | 9.395  | 185   | 1.561 | 12.438    | 6.351    |
| Mexico        | Male   | 9.499  | 381   | 1.209 | 11.856    | 7.142    |
| Pakistan      | Female | 9.193  | 140   | 1.662 | 12.433    | 5.953    |
| Pakistan      | Male   | 9.57   | 121   | 1.687 | 12.861    | 6.28     |
| United States | Female | 8.548  | 104   | 1.925 | 12.302    | 4.794    |
| United States | Male   | 9.058  | 223   | 1.462 | 11.908    | 6.208    |
| Zambia        | Female | 9.174  | 46    | 1.651 | 12.393    | 5.955    |
| Zambia        | Male   | 9.233  | 30    | 1.305 | 11.778    | 6.689    |

**Table S11.** CovKd statistics for different AgeBin across different countries.

| Country    | AgeBin     | Mean   | Count | Std.  | CI95_high | CI95_low |
|------------|------------|--------|-------|-------|-----------|----------|
| Bangladesh | <= 25      | 17.349 | 332   | 2.564 | 22.349    | 12.35    |
| Bangladesh | >25 - <=50 | 17.74  | 150   | 2.406 | 22.433    | 13.047   |
| Bangladesh | >50        |        | 0     |       |           | 0        |
| China      | <= 25      | 16.793 | 381   | 4.119 | 24.826    | 8.76     |
| China      | >25 - <=50 | 16.837 | 245   | 3.902 | 24.446    | 9.227    |
| China      | >50        | 14.326 | 86    | 2.855 | 19.893    | 8.758    |

|               |            |        |     |       |        |        |
|---------------|------------|--------|-----|-------|--------|--------|
| Japan         | <= 25      | 14.286 | 14  | 2.268 | 18.708 | 9.864  |
| Japan         | >25 - <=50 | 13.436 | 55  | 2.74  | 18.78  | 8.093  |
| Japan         | >50        | 15.4   | 10  | 2.319 | 19.922 | 10.878 |
| Malaysia      | <= 25      | 15.25  | 12  | 2.417 | 19.963 | 10.537 |
| Malaysia      | >25 - <=50 | 16.12  | 117 | 3.015 | 21.999 | 10.241 |
| Malaysia      | >50        | 15.2   | 15  | 2.883 | 20.823 | 9.577  |
| Mexico        | <= 25      | 15.865 | 282 | 3.246 | 22.195 | 9.535  |
| Mexico        | >25 - <=50 | 16.626 | 198 | 2.933 | 22.345 | 10.907 |
| Mexico        | >50        | 16.733 | 86  | 2.698 | 21.994 | 11.471 |
| Pakistan      | <= 25      | 17.426 | 68  | 2.75  | 22.789 | 12.064 |
| Pakistan      | >25 - <=50 | 17.383 | 193 | 2.626 | 22.503 | 12.263 |
| Pakistan      | >50        |        | 0   |       |        | 0      |
| United States | <= 25      | 15.471 | 174 | 3.056 | 21.43  | 9.513  |
| United States | >25 - <=50 | 16.612 | 103 | 2.587 | 21.656 | 11.568 |
| United States | >50        | 15.56  | 50  | 3.876 | 23.119 | 8.001  |
| Zambia        | <= 25      | 15.727 | 11  | 2.936 | 21.452 | 10.003 |
| Zambia        | >25 - <=50 | 16.556 | 63  | 2.999 | 22.403 | 10.708 |
| Zambia        | >50        | 17     | 2   | 0     | 17     | 17     |

**Table S12.** CovKd statistics for different education group across different countries.

| Country       | Education | Mean   | Count | Std.  | CI95_high | CI95_low |
|---------------|-----------|--------|-------|-------|-----------|----------|
| Bangladesh    | S         | 17.929 | 42    | 2.224 | 22.265    | 13.592   |
| Bangladesh    | T         | 17.578 | 204   | 2.394 | 22.247    | 12.91    |
| China         | P         | 16.642 | 106   | 3.924 | 24.292    | 8.991    |
| China         | S         | 16.469 | 32    | 4.486 | 25.217    | 7.72     |
| China         | T         | 16.501 | 565   | 4     | 24.301    | 8.701    |
| Japan         | S         | 14.167 | 12    | 3.129 | 20.267    | 8.066    |
| Japan         | T         | 13.731 | 52    | 2.68  | 18.956    | 8.505    |
| Malaysia      | S         | 16.5   | 2     | 2.121 | 20.637    | 12.363   |
| Malaysia      | T         | 15.741 | 81    | 2.876 | 21.348    | 10.133   |
| Mexico        | S         | 16.091 | 77    | 2.912 | 21.769    | 10.413   |
| Mexico        | T         | 16.202 | 307   | 3.101 | 22.25     | 10.154   |
| Pakistan      | S         | 17     | 7     | 4.509 | 25.793    | 8.207    |
| Pakistan      | T         | 17.393 | 122   | 2.611 | 22.486    | 12.301   |
| United States | S         | 16.159 | 44    | 3.065 | 22.135    | 10.183   |

|               |   |        |     |       |        |        |
|---------------|---|--------|-----|-------|--------|--------|
| United States | T | 15.993 | 146 | 3.005 | 21.852 | 10.134 |
| Zambia        | T | 16.19  | 42  | 2.915 | 21.875 | 10.505 |

**Table S13.** CovKd statistics for different profession group across different countries.

| Country       | Profession                 | Mean   | Count | Std.  | CI95_high | CI95_low |
|---------------|----------------------------|--------|-------|-------|-----------|----------|
| Bangladesh    | Academician/Administration | 17.186 | 145   | 2.925 | 22.89     | 11.483   |
| Bangladesh    | Medical Professionals      | 17.593 | 337   | 2.318 | 22.113    | 13.073   |
| China         | Academician/Administration | 16.695 | 564   | 4.015 | 24.525    | 8.865    |
| China         | Medical Professionals      | 15.804 | 148   | 3.827 | 23.267    | 8.341    |
| Japan         | Academician/Administration | 13.695 | 59    | 2.824 | 19.201    | 8.188    |
| Japan         | Medical Professionals      | 14.25  | 20    | 2.173 | 18.488    | 10.012   |
| Malaysia      | Academician/Administration | 15.627 | 51    | 3.187 | 21.843    | 9.412    |
| Malaysia      | Medical Professionals      | 16.129 | 93    | 2.829 | 21.646    | 10.612   |
| Mexico        | Academician/Administration | 16.209 | 339   | 3.253 | 22.552    | 9.867    |
| Mexico        | Medical Professionals      | 16.344 | 227   | 2.811 | 21.824    | 10.863   |
| Pakistan      | Academician/Administration | 16.741 | 58    | 2.869 | 22.336    | 11.147   |
| Pakistan      | Medical Professionals      | 17.581 | 203   | 2.565 | 22.584    | 12.579   |
| United States | Academician/Administration | 15.747 | 233   | 3.172 | 21.932    | 9.562    |
| United States | Medical Professionals      | 16.085 | 94    | 2.898 | 21.737    | 10.433   |
| Zambia        | Academician/Administration | 16.123 | 57    | 2.66  | 21.309    | 10.936   |

|        |                       |        |    |      |        |        |
|--------|-----------------------|--------|----|------|--------|--------|
| Zambia | Medical Professionals | 17.421 | 19 | 3.58 | 24.401 | 10.441 |
|--------|-----------------------|--------|----|------|--------|--------|

**Table S14.** CovKd statistics for different gender group across different countries.

| Country       | Gender | Mean   | Count | Std.  | CI95_high | CI95_low |
|---------------|--------|--------|-------|-------|-----------|----------|
| Bangladesh    | Female | 17.511 | 227   | 2.688 | 22.752    | 12.27    |
| Bangladesh    | Male   | 17.435 | 255   | 2.365 | 22.047    | 12.824   |
| China         | Female | 16.679 | 324   | 4.133 | 24.738    | 8.62     |
| China         | Male   | 16.369 | 388   | 3.868 | 23.911    | 8.826    |
| Japan         | Female | 13.587 | 46    | 2.663 | 18.78     | 8.394    |
| Japan         | Male   | 14.182 | 33    | 2.686 | 19.42     | 8.944    |
| Malaysia      | Female | 15.667 | 45    | 3.444 | 22.383    | 8.95     |
| Malaysia      | Male   | 16.081 | 99    | 2.721 | 21.386    | 10.776   |
| Mexico        | Female | 16.168 | 185   | 3.344 | 22.689    | 9.646    |
| Mexico        | Male   | 16.31  | 381   | 2.948 | 22.059    | 10.56    |
| Pakistan      | Female | 17.107 | 140   | 2.689 | 22.352    | 11.863   |
| Pakistan      | Male   | 17.727 | 121   | 2.582 | 22.762    | 12.692   |
| United States | Female | 15.096 | 104   | 3.105 | 21.151    | 9.041    |
| United States | Male   | 16.193 | 223   | 3.035 | 22.111    | 10.275   |
| Zambia        | Female | 16.5   | 46    | 2.795 | 21.95     | 11.05    |
| Zambia        | Male   | 16.367 | 30    | 3.211 | 22.628    | 10.106   |

**Table S15.** CovOp statistics for different AgeBin across different countries.

| Country    | AgeBin     | Mean   | Count | Std.  | CI95_high | CI95_low |
|------------|------------|--------|-------|-------|-----------|----------|
| Bangladesh | <= 25      | 22.997 | 332   | 1.878 | 26.658    | 19.336   |
| Bangladesh | >25 - <=50 | 23.48  | 150   | 1.881 | 27.149    | 19.811   |
| Bangladesh | >50        |        | 0     |       |           | 0        |
| China      | <= 25      | 12.929 | 381   | 2.641 | 18.08     | 7.779    |
| China      | >25 - <=50 | 12.384 | 245   | 2.896 | 18.03     | 6.737    |
| China      | >50        | 8.535  | 86    | 3.271 | 14.913    | 2.157    |
| Japan      | <= 25      | 20.357 | 14    | 1.646 | 23.567    | 17.148   |
| Japan      | >25 - <=50 | 20.909 | 55    | 2.32  | 25.432    | 16.386   |
| Japan      | >50        | 20.3   | 10    | 2.003 | 24.205    | 16.395   |
| Malaysia   | <= 25      | 23.833 | 12    | 1.115 | 26.007    | 21.66    |

|               |            |        |     |       |        |        |
|---------------|------------|--------|-----|-------|--------|--------|
| Malaysia      | >25 - <=50 | 23.786 | 117 | 1.8   | 27.295 | 20.277 |
| Malaysia      | >50        | 24.2   | 15  | 1.014 | 26.178 | 22.222 |
| Mexico        | <= 25      | 22.635 | 282 | 2.409 | 27.333 | 17.936 |
| Mexico        | >25 - <=50 | 22.586 | 198 | 2.357 | 27.181 | 17.991 |
| Mexico        | >50        | 22.791 | 86  | 2.229 | 27.137 | 18.445 |
| Pakistan      | <= 25      | 22.897 | 68  | 1.72  | 26.252 | 19.542 |
| Pakistan      | >25 - <=50 | 23.425 | 193 | 1.965 | 27.256 | 19.594 |
| Pakistan      | >50        |        | 0   |       |        | 0      |
| United States | <= 25      | 21.902 | 174 | 2.896 | 27.55  | 16.254 |
| United States | >25 - <=50 | 22.971 | 103 | 2.471 | 27.79  | 18.152 |
| United States | >50        | 21.96  | 50  | 3.023 | 27.856 | 16.064 |
| Zambia        | <= 25      | 22.455 | 11  | 1.809 | 25.982 | 18.927 |
| Zambia        | >25 - <=50 | 21.984 | 63  | 2.129 | 26.135 | 17.833 |
| Zambia        | >50        | 21.5   | 2   | 3.536 | 28.394 | 14.606 |

**Table S16.** CovOp statistics for different education group across different countries.

| Country       | Education | Mean   | Count | Std.  | CI95_high | CI95_low |
|---------------|-----------|--------|-------|-------|-----------|----------|
| Bangladesh    | S         | 22.833 | 42    | 1.962 | 26.659    | 19.007   |
| Bangladesh    | T         | 23.167 | 204   | 1.943 | 26.955    | 19.378   |
| China         | P         | 11.943 | 106   | 3.323 | 18.424    | 5.463    |
| China         | S         | 11.125 | 32    | 3.28  | 17.521    | 4.729    |
| China         | T         | 12.382 | 565   | 3.04  | 18.31     | 6.455    |
| Japan         | S         | 19.917 | 12    | 1.443 | 22.731    | 17.102   |
| Japan         | T         | 21.173 | 52    | 2.074 | 25.218    | 17.128   |
| Malaysia      | S         | 23.5   | 2     | 0.707 | 24.879    | 22.121   |
| Malaysia      | T         | 23.926 | 81    | 1.618 | 27.082    | 20.77    |
| Mexico        | S         | 22.481 | 77    | 2.088 | 26.551    | 18.41    |
| Mexico        | T         | 22.515 | 307   | 2.389 | 27.174    | 17.856   |
| Pakistan      | S         | 22.714 | 7     | 0.951 | 24.569    | 20.859   |
| Pakistan      | T         | 23.328 | 122   | 1.717 | 26.677    | 19.979   |
| United States | S         | 22.409 | 44    | 3.006 | 28.271    | 16.547   |
| United States | T         | 22.253 | 146   | 2.933 | 27.973    | 16.533   |
| Zambia        | T         | 22.143 | 42    | 2.148 | 26.331    | 17.955   |



**Table S17.** CovOp statistics for different profession group across different countries.

| Country       | Profession                 | Mean   | Count | Std.  | CI95_high | CI95_low |
|---------------|----------------------------|--------|-------|-------|-----------|----------|
| Bangladesh    | Academician/Administration | 22.717 | 145   | 2.26  | 27.124    | 18.311   |
| Bangladesh    | Medical Professionals      | 23.332 | 337   | 1.677 | 26.602    | 20.062   |
| China         | Academician/Administration | 12.684 | 564   | 2.983 | 18.501    | 6.867    |
| China         | Medical Professionals      | 10.405 | 148   | 3.035 | 16.323    | 4.488    |
| Japan         | Academician/Administration | 20.78  | 59    | 2.221 | 25.111    | 16.448   |
| Japan         | Medical Professionals      | 20.6   | 20    | 2.062 | 24.621    | 16.579   |
| Malaysia      | Academician/Administration | 23.588 | 51    | 2.022 | 27.53     | 19.646   |
| Malaysia      | Medical Professionals      | 23.968 | 93    | 1.463 | 26.821    | 21.115   |
| Mexico        | Academician/Administration | 22.634 | 339   | 2.432 | 27.376    | 17.892   |
| Mexico        | Medical Professionals      | 22.652 | 227   | 2.257 | 27.054    | 18.25    |
| Pakistan      | Academician/Administration | 23.034 | 58    | 1.716 | 26.382    | 19.687   |
| Pakistan      | Medical Professionals      | 23.36  | 203   | 1.966 | 27.193    | 19.526   |
| United States | Academician/Administration | 22.107 | 233   | 2.809 | 27.584    | 16.63    |
| United States | Medical Professionals      | 22.596 | 94    | 2.849 | 28.15     | 17.041   |
| Zambia        | Academician/Administration | 21.982 | 57    | 2.125 | 26.127    | 17.838   |
| Zambia        | Medical Professionals      | 22.211 | 19    | 2.043 | 26.195    | 18.226   |

**Table S18.** CovOp statistics for different gender group across different countries.

| Country       | Gender | Mean   | Count | Std.  | CI95_high | CI95_low |
|---------------|--------|--------|-------|-------|-----------|----------|
| Bangladesh    | Female | 23.026 | 227   | 1.973 | 26.874    | 19.179   |
| Bangladesh    | Male   | 23.255 | 255   | 1.81  | 26.785    | 19.725   |
| China         | Female | 11.985 | 324   | 3.298 | 18.415    | 5.554    |
| China         | Male   | 12.399 | 388   | 2.977 | 18.204    | 6.595    |
| Japan         | Female | 20.761 | 46    | 2.415 | 25.469    | 16.052   |
| Japan         | Male   | 20.697 | 33    | 1.811 | 24.229    | 17.165   |
| Malaysia      | Female | 23.911 | 45    | 1.579 | 26.989    | 20.833   |
| Malaysia      | Male   | 23.798 | 99    | 1.738 | 27.187    | 20.409   |
| Mexico        | Female | 22.605 | 185   | 2.556 | 27.59     | 17.621   |
| Mexico        | Male   | 22.659 | 381   | 2.264 | 27.073    | 18.244   |
| Pakistan      | Female | 23.164 | 140   | 1.69  | 26.461    | 19.868   |
| Pakistan      | Male   | 23.43  | 121   | 2.144 | 27.611    | 19.249   |
| United States | Female | 21.577 | 104   | 3.346 | 28.102    | 15.052   |
| United States | Male   | 22.561 | 223   | 2.492 | 27.42     | 17.701   |
| Zambia        | Female | 21.761 | 46    | 2.223 | 26.096    | 17.426   |
| Zambia        | Male   | 22.467 | 30    | 1.833 | 26.042    | 18.892   |

**Table S19.** CovPsy statistics for different AgeBin across different countries.

| Country    | AgeBin     | Mean  | Count | Std.  | CI95_high | CI95_low |
|------------|------------|-------|-------|-------|-----------|----------|
| Bangladesh | <= 25      | 2.599 | 332   | 1.672 | 5.86      | 0        |
| Bangladesh | >25 - <=50 | 2.893 | 150   | 1.598 | 6.009     | 0        |
| Bangladesh | >50        |       | 0     |       |           | 0        |
| China      | <= 25      | 2.493 | 381   | 1.677 | 5.764     | 0        |
| China      | >25 - <=50 | 2.506 | 245   | 1.575 | 5.577     | 0        |
| China      | >50        | 2.209 | 86    | 1.415 | 4.969     | 0        |
| Japan      | <= 25      | 2.214 | 14    | 1.122 | 4.402     | 0.027    |
| Japan      | >25 - <=50 | 2.273 | 55    | 1.297 | 4.803     | 0        |
| Japan      | >50        | 2.5   | 10    | 0.972 | 4.395     | 0.605    |
| Malaysia   | <= 25      | 1.75  | 12    | 1.96  | 5.572     | 0        |
| Malaysia   | >25 - <=50 | 1.632 | 117   | 1.674 | 4.897     | 0        |
| Malaysia   | >50        | 1.8   | 15    | 1.568 | 4.857     | 0        |

|               |            |       |     |       |       |       |
|---------------|------------|-------|-----|-------|-------|-------|
| Mexico        | <= 25      | 2.699 | 282 | 1.453 | 5.532 | 0     |
| Mexico        | >25 - <=50 | 2.247 | 198 | 1.604 | 5.375 | 0     |
| Mexico        | >50        | 1.791 | 86  | 1.48  | 4.677 | 0     |
| Pakistan      | <= 25      | 2.662 | 68  | 1.905 | 6.377 | 0     |
| Pakistan      | >25 - <=50 | 2.197 | 193 | 1.65  | 5.414 | 0     |
| Pakistan      | >50        |       | 0   |       |       | 0     |
| United States | <= 25      | 2.454 | 174 | 1.519 | 5.416 | 0     |
| United States | >25 - <=50 | 2.447 | 103 | 1.613 | 5.592 | 0     |
| United States | >50        | 1.7   | 50  | 1.632 | 4.882 | 0     |
| Zambia        | <= 25      | 2.545 | 11  | 1.44  | 5.353 | 0     |
| Zambia        | >25 - <=50 | 2.714 | 63  | 1.549 | 5.736 | 0     |
| Zambia        | >50        | 4     | 2   | 1.414 | 6.758 | 1.242 |

**Table S20.** CovPsy statistics for different education group across different countries.

| Country       | Education | Mean  | Count | Std.  | CI95_high | CI95_low |
|---------------|-----------|-------|-------|-------|-----------|----------|
| Bangladesh    | S         | 2.81  | 42    | 1.685 | 6.096     | 0        |
| Bangladesh    | T         | 2.711 | 204   | 1.673 | 5.972     | 0        |
| China         | P         | 2.311 | 106   | 1.658 | 5.545     | 0        |
| China         | S         | 2.719 | 32    | 1.55  | 5.741     | 0        |
| China         | T         | 2.474 | 565   | 1.615 | 5.623     | 0        |
| Japan         | S         | 2.083 | 12    | 1.311 | 4.641     | 0        |
| Japan         | T         | 2.519 | 52    | 1.18  | 4.82      | 0.219    |
| Malaysia      | S         | 2.5   | 2     | 3.536 | 9.394     | 0        |
| Malaysia      | T         | 1.531 | 81    | 1.492 | 4.441     | 0        |
| Mexico        | S         | 2.558 | 77    | 1.634 | 5.745     | 0        |
| Mexico        | T         | 2.352 | 307   | 1.536 | 5.347     | 0        |
| Pakistan      | S         | 2.571 | 7     | 2.225 | 6.911     | 0        |
| Pakistan      | T         | 2.221 | 122   | 1.727 | 5.59      | 0        |
| United States | S         | 2.318 | 44    | 1.537 | 5.315     | 0        |
| United States | T         | 2.466 | 146   | 1.589 | 5.565     | 0        |
| Zambia        | T         | 2.714 | 42    | 1.503 | 5.644     | 0        |

**Table S21.** CovPsy statistics for different profession group across different countries.

| Country    | Profession                 | Mean  | Count | Std.  | CI95_high | CI95_low |
|------------|----------------------------|-------|-------|-------|-----------|----------|
| Bangladesh | Academician/Administration | 2.586 | 145   | 1.722 | 5.945     | 0        |

|               |                            |       |     |       |       |       |
|---------------|----------------------------|-------|-----|-------|-------|-------|
| Bangladesh    | Medical Professionals      | 2.736 | 337 | 1.623 | 5.902 | 0     |
| China         | Academician/Administration | 2.388 | 564 | 1.671 | 5.647 | 0     |
| China         | Medical Professionals      | 2.75  | 148 | 1.339 | 5.362 | 0.138 |
| Japan         | Academician/Administration | 2.203 | 59  | 1.186 | 4.516 | 0     |
| Japan         | Medical Professionals      | 2.55  | 20  | 1.317 | 5.118 | 0     |
| Malaysia      | Academician/Administration | 1.824 | 51  | 1.705 | 5.149 | 0     |
| Malaysia      | Medical Professionals      | 1.57  | 93  | 1.664 | 4.815 | 0     |
| Mexico        | Academician/Administration | 2.277 | 339 | 1.578 | 5.355 | 0     |
| Mexico        | Medical Professionals      | 2.59  | 227 | 1.477 | 5.47  | 0     |
| Pakistan      | Academician/Administration | 2.103 | 58  | 1.842 | 5.695 | 0     |
| Pakistan      | Medical Professionals      | 2.379 | 203 | 1.694 | 5.683 | 0     |
| United States | Academician/Administration | 2.3   | 233 | 1.561 | 5.343 | 0     |
| United States | Medical Professionals      | 2.426 | 94  | 1.649 | 5.642 | 0     |
| Zambia        | Academician/Administration | 2.667 | 57  | 1.456 | 5.505 | 0     |
| Zambia        | Medical Professionals      | 2.895 | 19  | 1.761 | 6.328 | 0     |

**Table S22.** CovPsy statistics for different gender group across different countries.

| Country    | Gender | Mean  | Count | Std.  | CI95_high | CI95_low |
|------------|--------|-------|-------|-------|-----------|----------|
| Bangladesh | Female | 2.581 | 227   | 1.736 | 5.967     | 0        |
| Bangladesh | Male   | 2.788 | 255   | 1.573 | 5.856     | 0        |
| China      | Female | 2.21  | 324   | 1.568 | 5.267     | 0        |
| China      | Male   | 2.675 | 388   | 1.623 | 5.84      | 0        |

|               |        |       |     |       |       |       |
|---------------|--------|-------|-----|-------|-------|-------|
| Japan         | Female | 2.043 | 46  | 1.095 | 4.178 | 0     |
| Japan         | Male   | 2.636 | 33  | 1.319 | 5.208 | 0.065 |
| Malaysia      | Female | 1.889 | 45  | 1.874 | 5.542 | 0     |
| Malaysia      | Male   | 1.556 | 99  | 1.579 | 4.635 | 0     |
| Mexico        | Female | 1.984 | 185 | 1.627 | 5.156 | 0     |
| Mexico        | Male   | 2.606 | 381 | 1.463 | 5.458 | 0     |
| Pakistan      | Female | 2.179 | 140 | 1.808 | 5.705 | 0     |
| Pakistan      | Male   | 2.479 | 121 | 1.623 | 5.645 | 0     |
| United States | Female | 1.808 | 104 | 1.667 | 5.058 | 0     |
| United States | Male   | 2.583 | 223 | 1.486 | 5.481 | 0     |
| Zambia        | Female | 2.739 | 46  | 1.612 | 5.882 | 0     |
| Zambia        | Male   | 2.7   | 30  | 1.418 | 5.465 | 0     |

**Table S23.** CovSus statistics for different AgeBin across different countries.

| Country       | AgeBin     | Mean  | Count | Std.  | CI95_high | CI95_low |
|---------------|------------|-------|-------|-------|-----------|----------|
| Bangladesh    | <= 25      | 1.584 | 332   | 1.588 | 4.681     | 0        |
| Bangladesh    | >25 - <=50 | 1.913 | 150   | 1.366 | 4.576     | 0        |
| Bangladesh    | >50        |       | 0     |       |           | 0        |
| China         | <= 25      | 0.714 | 381   | 1.233 | 3.118     | 0        |
| China         | >25 - <=50 | 0.853 | 245   | 1.202 | 3.198     | 0        |
| China         | >50        | 1.384 | 86    | 1.129 | 3.585     | 0        |
| Japan         | <= 25      | 3.286 | 14    | 0.914 | 5.068     | 1.504    |
| Japan         | >25 - <=50 | 3.218 | 55    | 1.049 | 5.263     | 1.173    |
| Japan         | >50        | 3.6   | 10    | 0.516 | 4.607     | 2.593    |
| Malaysia      | <= 25      | 0.75  | 12    | 1.545 | 3.762     | 0        |
| Malaysia      | >25 - <=50 | 1.718 | 117   | 1.623 | 4.883     | 0        |
| Malaysia      | >50        | 1.6   | 15    | 1.724 | 4.961     | 0        |
| Mexico        | <= 25      | 0.762 | 282   | 1.127 | 2.961     | 0        |
| Mexico        | >25 - <=50 | 0.869 | 198   | 0.994 | 2.807     | 0        |
| Mexico        | >50        | 1.174 | 86    | 1.108 | 3.335     | 0        |
| Pakistan      | <= 25      | 2     | 68    | 1.639 | 5.196     | 0        |
| Pakistan      | >25 - <=50 | 1.725 | 193   | 1.419 | 4.492     | 0        |
| Pakistan      | >50        |       | 0     |       |           | 0        |
| United States | <= 25      | 0.833 | 174   | 1.148 | 3.073     | 0        |
| United States | >25 - <=50 | 1.117 | 103   | 1.402 | 3.851     | 0        |
| United States | >50        | 1.38  | 50    | 1.497 | 4.299     | 0        |

|        |            |       |    |       |       |   |
|--------|------------|-------|----|-------|-------|---|
| Zambia | <= 25      | 2     | 11 | 1.673 | 5.263 | 0 |
| Zambia | >25 - <=50 | 2.048 | 63 | 1.679 | 5.322 | 0 |
| Zambia | >50        | 0     | 2  | 0     | 0     | 0 |

**Table S24.** CovSus statistics for different education group across different countries.

| Country       | Education | Mean  | Count | Std.  | CI95_high | CI95_low |
|---------------|-----------|-------|-------|-------|-----------|----------|
| Bangladesh    | S         | 1.929 | 42    | 1.659 | 5.163     | 0        |
| Bangladesh    | T         | 1.529 | 204   | 1.513 | 4.48      | 0        |
| China         | P         | 1.198 | 106   | 1.369 | 3.868     | 0        |
| China         | S         | 0.594 | 32    | 0.756 | 2.068     | 0        |
| China         | T         | 0.786 | 565   | 1.214 | 3.153     | 0        |
| Japan         | S         | 3.25  | 12    | 0.965 | 5.132     | 1.368    |
| Japan         | T         | 3.308 | 52    | 1.02  | 5.297     | 1.318    |
| Malaysia      | S         | 2     | 2     | 2.828 | 7.515     | 0        |
| Malaysia      | T         | 1.691 | 81    | 1.671 | 4.949     | 0        |
| Mexico        | S         | 0.74  | 77    | 1.093 | 2.872     | 0        |
| Mexico        | T         | 0.857 | 307   | 1.069 | 2.941     | 0        |
| Pakistan      | S         | 2.714 | 7     | 1.38  | 5.406     | 0.023    |
| Pakistan      | T         | 1.803 | 122   | 1.53  | 4.787     | 0        |
| United States | S         | 0.932 | 44    | 1.371 | 3.605     | 0        |
| United States | T         | 1.041 | 146   | 1.297 | 3.569     | 0        |
| Zambia        | T         | 2.048 | 42    | 1.696 | 5.354     | 0        |

**Table S25.** CovSus statistics for different profession group across different countries.

| Country    | Profession                 | Mean  | Count | Std.  | CI95_high | CI95_low |
|------------|----------------------------|-------|-------|-------|-----------|----------|
| Bangladesh | Academician/Administration | 1.703 | 145   | 1.729 | 5.074     | 0        |
| Bangladesh | Medical Professionals      | 1.68  | 337   | 1.437 | 4.481     | 0        |
| China      | Academician/Administration | 0.644 | 564   | 1.157 | 2.899     | 0        |
| China      | Medical Professionals      | 1.601 | 148   | 1.194 | 3.929     | 0        |
| Japan      | Academician/Administration | 3.322 | 59    | 0.937 | 5.148     | 1.496    |

|               |                            |       |     |       |       |       |
|---------------|----------------------------|-------|-----|-------|-------|-------|
| Japan         | Medical Professionals      | 3.15  | 20  | 1.089 | 5.274 | 1.026 |
| Malaysia      | Academician/Administration | 1.49  | 51  | 1.713 | 4.831 | 0     |
| Malaysia      | Medical Professionals      | 1.699 | 93  | 1.6   | 4.819 | 0     |
| Mexico        | Academician/Administration | 0.876 | 339 | 1.121 | 3.062 | 0     |
| Mexico        | Medical Professionals      | 0.841 | 227 | 1.035 | 2.86  | 0     |
| Pakistan      | Academician/Administration | 1.241 | 58  | 1.548 | 4.26  | 0     |
| Pakistan      | Medical Professionals      | 1.956 | 203 | 1.426 | 4.736 | 0     |
| United States | Academician/Administration | 0.884 | 233 | 1.269 | 3.36  | 0     |
| United States | Medical Professionals      | 1.309 | 94  | 1.336 | 3.914 | 0     |
| Zambia        | Academician/Administration | 1.93  | 57  | 1.72  | 5.284 | 0     |
| Zambia        | Medical Professionals      | 2.158 | 19  | 1.573 | 5.225 | 0     |

**Table S26.** CovSus statistics for different gender group across different countries.

| Country    | Gender | Mean  | Count | Std.  | CI95_high | CI95_low |
|------------|--------|-------|-------|-------|-----------|----------|
| Bangladesh | Female | 1.952 | 227   | 1.589 | 5.05      | 0        |
| Bangladesh | Male   | 1.451 | 255   | 1.435 | 4.249     | 0        |
| China      | Female | 0.84  | 324   | 1.196 | 3.171     | 0        |
| China      | Male   | 0.845 | 388   | 1.254 | 3.291     | 0        |
| Japan      | Female | 3.13  | 46    | 1.024 | 5.128     | 1.133    |
| Japan      | Male   | 3.485 | 33    | 0.87  | 5.182     | 1.788    |
| Malaysia   | Female | 1.844 | 45    | 1.796 | 5.346     | 0        |
| Malaysia   | Male   | 1.525 | 99    | 1.561 | 4.568     | 0        |
| Mexico     | Female | 0.935 | 185   | 1.131 | 3.14      | 0        |
| Mexico     | Male   | 0.827 | 381   | 1.064 | 2.902     | 0        |
| Pakistan   | Female | 1.843 | 140   | 1.533 | 4.832     | 0        |

|               |        |       |     |       |       |   |
|---------------|--------|-------|-----|-------|-------|---|
| Pakistan      | Male   | 1.744 | 121 | 1.423 | 4.519 | 0 |
| United States | Female | 1.154 | 104 | 1.473 | 4.027 | 0 |
| United States | Male   | 0.937 | 223 | 1.21  | 3.297 | 0 |
| Zambia        | Female | 2.304 | 46  | 1.631 | 5.485 | 0 |
| Zambia        | Male   | 1.5   | 30  | 1.656 | 4.729 | 0 |



## Knowledge, Perception and Control measures on COVID-19

### Socio Demographic information:

1. Your profession: .....
2. Place of residence (Country):
3. Place of residence (province & city):
4. Highest Level of education:
5. Which setting do you work?.....
6. Sex:     ☐Female   ☐Male
7. Age (years):
8. Marital status: ☐Single   ☐Married   ☐Divorced/Separated
9. Monthly total Income/family income in local currency (optional)

### **Part 1: Knowledge/ Awareness**

- 1.1 Have you heard about COVID-19?  
☐No           ☐Yes
- 1.2 Where did you hear about Coronavirus (COVID-19) most? (multiple answer acceptable)
  - ☐Television/Radio
  - ☐Newspaper/ Magazines
  - ☐Social media (Facebook/ twitter/ YouTube/ Instagram etc.)
  - ☐Colleagues/workplace
  - ☐Neighbors
  - ☐Others (answer if others)
- 1.3 How would you rate the extend of your knowledge of COVID-19?  

1  
very limited

2  
☐

3  
☐

4  
☐

5  
☐

good understanding
- 1.4 How does COVID19 Spread/Transmitted (multiple answer acceptable)

| Spread/Transmissions | Yes | No |
|----------------------|-----|----|
|----------------------|-----|----|

|                                                       |                          |                          |
|-------------------------------------------------------|--------------------------|--------------------------|
| Contact with respiratory droplets of infected persons | <input type="checkbox"/> | <input type="checkbox"/> |
| Touching and shaking hands with an infected person    | <input type="checkbox"/> | <input type="checkbox"/> |
| The use of objects used by an infected person         | <input type="checkbox"/> | <input type="checkbox"/> |
| Sexual route                                          | <input type="checkbox"/> | <input type="checkbox"/> |
| Close contact with asymptomatic infected persons      | <input type="checkbox"/> | <input type="checkbox"/> |
|                                                       | <input type="checkbox"/> | <input type="checkbox"/> |
| COVID-19 can float on air almost 30 minutes           | <input type="checkbox"/> | <input type="checkbox"/> |
| Others (answer if others)                             |                          |                          |

1.5 In your opinion, what are the signs and symptoms of COVID-19 (check all that apply)

| Signs & Symptoms                           | Yes                      | No                       |
|--------------------------------------------|--------------------------|--------------------------|
| Fever                                      | <input type="checkbox"/> | <input type="checkbox"/> |
| Tiredness                                  | <input type="checkbox"/> | <input type="checkbox"/> |
| Dry cough                                  | <input type="checkbox"/> | <input type="checkbox"/> |
| Shortness of breath/Breathing difficulties | <input type="checkbox"/> | <input type="checkbox"/> |
| Aches and pains                            | <input type="checkbox"/> | <input type="checkbox"/> |
| Nasal congestion                           | <input type="checkbox"/> | <input type="checkbox"/> |
| Runny nose                                 | <input type="checkbox"/> | <input type="checkbox"/> |
| Sore throat                                | <input type="checkbox"/> | <input type="checkbox"/> |
| Diarrhea                                   | <input type="checkbox"/> | <input type="checkbox"/> |
| Others                                     |                          |                          |

1.6 Which mask(s) do you think is best to control the spread of the COVID-19?

- ☐ N95 Mask
- ☐ Surgical Mask
- ☐ Reusable Mask
- ☐ Any Mask
- ☐ Masks are not required
- ☐ Usage of masks depends on the situation and guidelines
- ☐ Other (answer if others)

## 1.7 How long is the incubation period for COVID-19?

- ☐ 2-14 days
- ☐ 1-7 days
- ☐ Don't know/ Not sure
- ☐ Other (answer if others)

## 1.8 Are there any vaccines, drugs or treatments for COVID-19?

- ☐ No
- ☐ Yes
- ☐ Don't know/Not sure

## 1.9 Are you familiar with the bellow terms? (check all that apply)

|                   | Yes                      | No                       |
|-------------------|--------------------------|--------------------------|
| Lock-down         | <input type="checkbox"/> | <input type="checkbox"/> |
| Self-isolation    | <input type="checkbox"/> | <input type="checkbox"/> |
| Home quarantine ) | <input type="checkbox"/> | <input type="checkbox"/> |

## 1.10 Are you concerned about anyone in your immediate environment (workplace/family e.g. parents, siblings, close friends/colleagues) at risk of infection with COVID-19 due to the following factors? (check all that apply)

|                                                                                                               | Yes                      | No                       | Not sure                 |
|---------------------------------------------------------------------------------------------------------------|--------------------------|--------------------------|--------------------------|
| age (over 60 years)                                                                                           | <input type="checkbox"/> | <input type="checkbox"/> | <input type="checkbox"/> |
| severe pre-existing conditions (e.g. Respiratory diseases, heart diseases, cancer, immune deficiency problem) | <input type="checkbox"/> | <input type="checkbox"/> | <input type="checkbox"/> |
| work environment (e.g. Working in the health care environment and involving in contact with patients)         | <input type="checkbox"/> | <input type="checkbox"/> | <input type="checkbox"/> |
| exposure to a risk zone/areas/country (e.g. China, Italy etc.)                                                | <input type="checkbox"/> | <input type="checkbox"/> | <input type="checkbox"/> |

## Part 2. Attitudes/Opinions

2.1 Do you think the government should lock-down/restrict travel areas to avoid spread of COVID-19?

- ☐ Strongly agree
- ☐ Agree
- ☐ Neutral
- ☐ Disagree
- ☐ Strongly disagree

2.2 Do you think home quarantine can reduce COVID-19 outbreaks?

- ☐ Strongly agree
- ☐ Agree
- ☐ Neutral
- ☐ Disagree
- ☐ Strongly disagree

2.3 Isolation and treatment of infected people are effective ways to reduce the spread of the virus?

- ☐ Strongly agree
- ☐ Agree
- ☐ Neutral
- ☐ Disagree
- ☐ Strongly disagree

2.4 Do you think personal hygiene is important in controlling the spread of COVID-19?

- ☐ Strongly agree
- ☐ Agree
- ☐ Neutral
- ☐ Disagree
- ☐ Strongly disagree

2.5 Media should take a leading role in raising awareness coronavirus risk reduction and prevention issues?

- ☐ Strongly agree
- ☐ Agree
- ☐ Neutral
- ☐ Disagree
- ☐ Strongly disagree

2.6 Do you think you are at increased personal risk of infection with COVID-19 due to any of the following factors?

(check all that apply)

|                     | Yes                      | No                       | Not sure                 |
|---------------------|--------------------------|--------------------------|--------------------------|
| age (over 60 years) | <input type="checkbox"/> | <input type="checkbox"/> | <input type="checkbox"/> |

|                                                                                                               |                          |                          |                          |
|---------------------------------------------------------------------------------------------------------------|--------------------------|--------------------------|--------------------------|
| severe pre-existing conditions (e.g. Respiratory diseases, heart diseases, cancer, immune deficiency problem) | <input type="checkbox"/> | <input type="checkbox"/> | <input type="checkbox"/> |
| work environment (e.g. Working in the health care environment and involving in contact with patients)         | <input type="checkbox"/> | <input type="checkbox"/> | <input type="checkbox"/> |
| exposure to a risk zone/areas/country (e.g. China, Italy etc.)                                                | <input type="checkbox"/> | <input type="checkbox"/> | <input type="checkbox"/> |
| Others (answer if others)                                                                                     |                          |                          |                          |

### **Part 3. Protection measures**

3.1 Do you have any of the following practices to prevent COVID-19 transmission (check all that apply)?

| Practices                                                    | Yes                      | No                       |
|--------------------------------------------------------------|--------------------------|--------------------------|
| Practicing self-isolation/Home quarantine                    | <input type="checkbox"/> | <input type="checkbox"/> |
| Practicing respiratory hygiene                               | <input type="checkbox"/> | <input type="checkbox"/> |
| Washing hand frequently using hand sanitizer (alcohol based) | <input type="checkbox"/> | <input type="checkbox"/> |
| Using face mask (Surgical)                                   | <input type="checkbox"/> | <input type="checkbox"/> |
| Avoiding touching nose, mouth and eyes                       | <input type="checkbox"/> | <input type="checkbox"/> |
| Maintaining social distance (min 1 meter)                    | <input type="checkbox"/> | <input type="checkbox"/> |

3.2 Have you been provided with personal protection equipment (PPE) in your workplace?

☐Yes ☐No ☐Maybe

3.3 Have you tested yourself for COVID-19?

☐Yes, it was requested by the public health department  
☐Yes, voluntarily  
☐No

3.4 Do you have any of the following practices during COVID-19 pandemic? (check all that apply)

|  |     |    |
|--|-----|----|
|  | Yes | No |
|--|-----|----|

|                                                                                   |                          |                          |
|-----------------------------------------------------------------------------------|--------------------------|--------------------------|
| Any handshake?                                                                    | <input type="checkbox"/> | <input type="checkbox"/> |
| Hug                                                                               | <input type="checkbox"/> | <input type="checkbox"/> |
| Visiting public places                                                            | <input type="checkbox"/> | <input type="checkbox"/> |
| Contact with infected person                                                      | <input type="checkbox"/> | <input type="checkbox"/> |
| You/your family members going church/ mosque/ temple/synagogue/ pagoda for prayer | <input type="checkbox"/> | <input type="checkbox"/> |

3.5 How many times you washed hand in last 12 hours or 24 hours:

3.6 What is your normal health seeking behavior regarding primary symptoms (fever/cough/pain/difficulty in breathing etc.)?

- ☐ Hide symptoms
- ☐ Seek immediate medical attention / treatment
- ☐ Wait for symptoms to go away
- ☐ Other

3.7 Are service providers of nearby health center available when necessary?

☐ No ☐ Yes

### **Source of Information**

3.8 Do you or your household members use internet?

☐ No ☐ Yes

3.9 Please indicate which of the following do you use for COVID-19 update (check all that apply)?

| Media                                                  | Yes                      | No                       |
|--------------------------------------------------------|--------------------------|--------------------------|
| Newspaper                                              | <input type="checkbox"/> | <input type="checkbox"/> |
| TV (local/ international)                              | <input type="checkbox"/> | <input type="checkbox"/> |
| Social media (Facebook, Instagram, Line, YouTube etc.) | <input type="checkbox"/> | <input type="checkbox"/> |
| Internet (WHO websites)                                | <input type="checkbox"/> | <input type="checkbox"/> |
| Radio                                                  |                          |                          |
| Others                                                 |                          |                          |

3.10 How much time, on average, per day do you spend on the topics related to COVID-19 (e.g. due to news coverage, work, conversations, thoughts)? Please indicate a daily average for the last seven days.

- ☐ Not at all
- ☐ 1-30 minutes

- ☐ 31-60 minutes
- ☐ 1 - 3 hours
- ☐ More than 3 hours per day
- ☐ Other:

4.1 What are your mental health/psychological problems regarding COVID-19? (check all that apply)

| Psychological aspects                                | Yes                      | No                       |
|------------------------------------------------------|--------------------------|--------------------------|
| Fear of falling ill and dying                        | <input type="checkbox"/> | <input type="checkbox"/> |
| Anxiety                                              | <input type="checkbox"/> | <input type="checkbox"/> |
| Depression                                           | <input type="checkbox"/> | <input type="checkbox"/> |
| Fear of being socially excluded/placed in quarantine | <input type="checkbox"/> | <input type="checkbox"/> |
| Feelings of helplessness, boredom, loneliness        | <input type="checkbox"/> | <input type="checkbox"/> |

Any Questions or Concerns about COVID-19, please do share:
